# Supplementary material
Source: PubMed Central journal article supplement (PMC4036531)
Supplement: NIHMS565966-supplement-1.pdf [file NIHMS565966-supplement-1.pdf]

## Electronic supplementary material

**ESM Table 1** Effects of resveratrol on the liver and kidney functions of NOD mice

| Variable            | Mouse group |             |             |
|---------------------|-------------|-------------|-------------|
|                     | PBS         | Feeding     | Injection   |
| ALT (IU/l)          | 53.6±11.2   | 43.1±7.8    | 37.6±9.3    |
| AST (IU/l)          | 128.1±27.6  | 132.7±17.5  | 107.6±23.1  |
| Creatinine (mmol/l) | 0.020±0.008 | 0.016±0.005 | 0.022±0.009 |

Values are mean±SE
