# Supplementary material
Source: PubMed Central journal article supplement (PMC4036531)

Supplemental Fig. 9

a

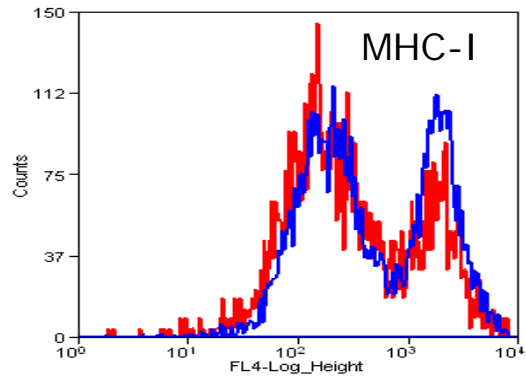

b

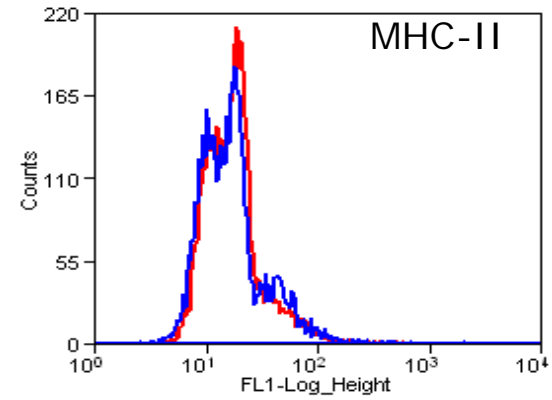

c

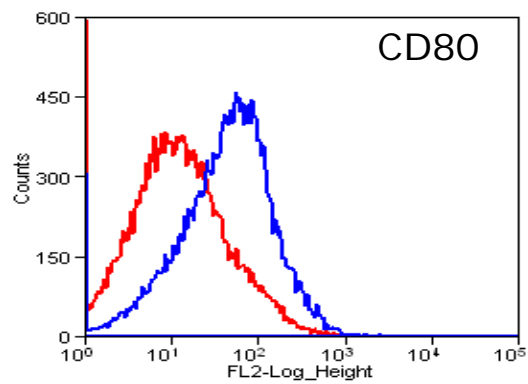

d

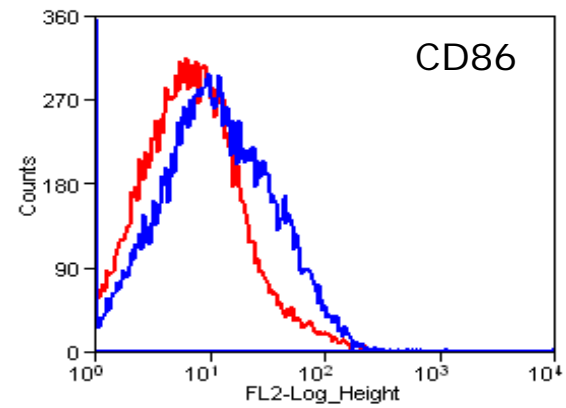

— PBS control  
— RES

Supplement: NIHMS565966-supplement-10.pdf [file NIHMS565966-supplement-10.pdf]

Supplemental Fig. 1a

a

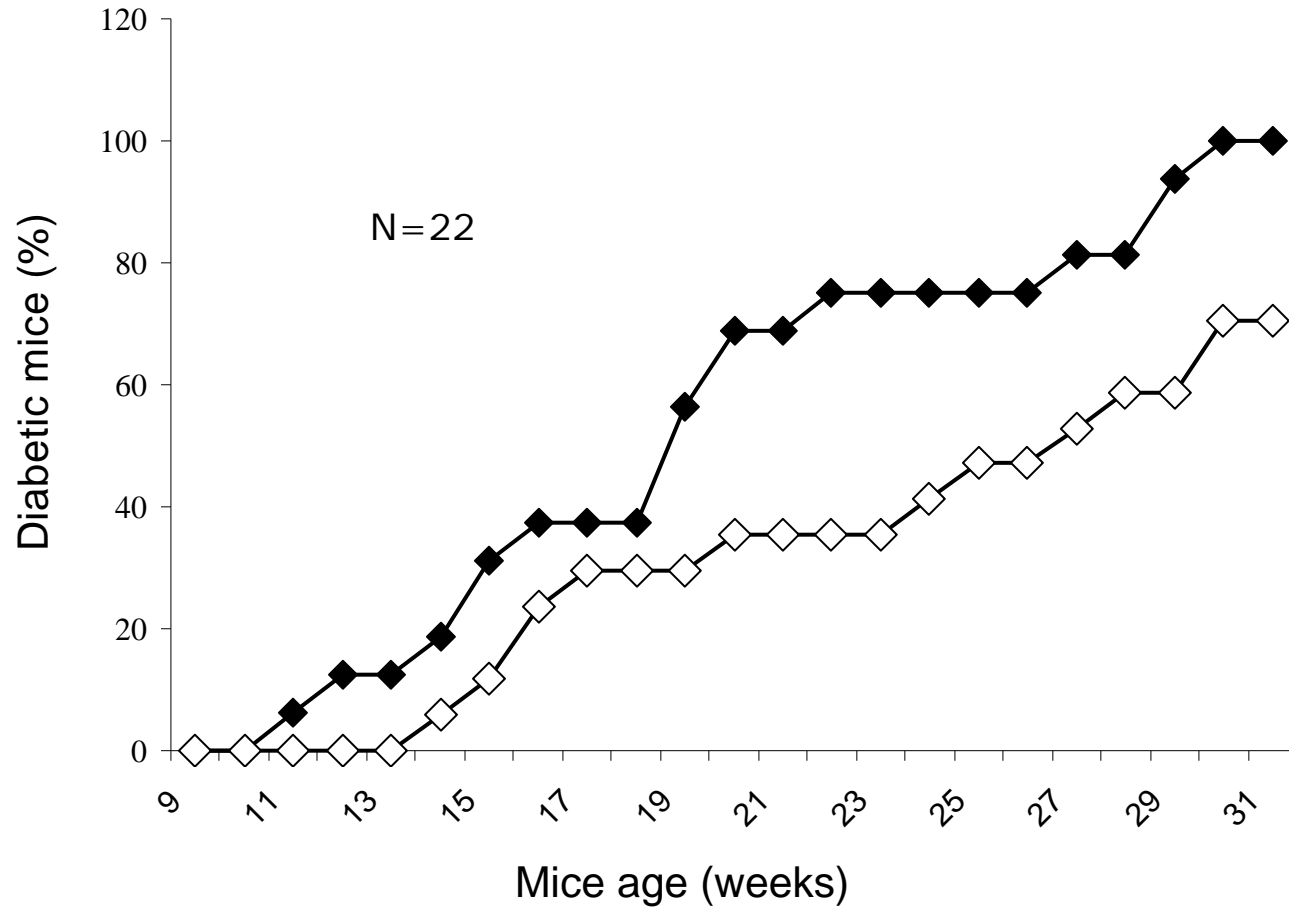

b

## Supplemental Fig. 1b

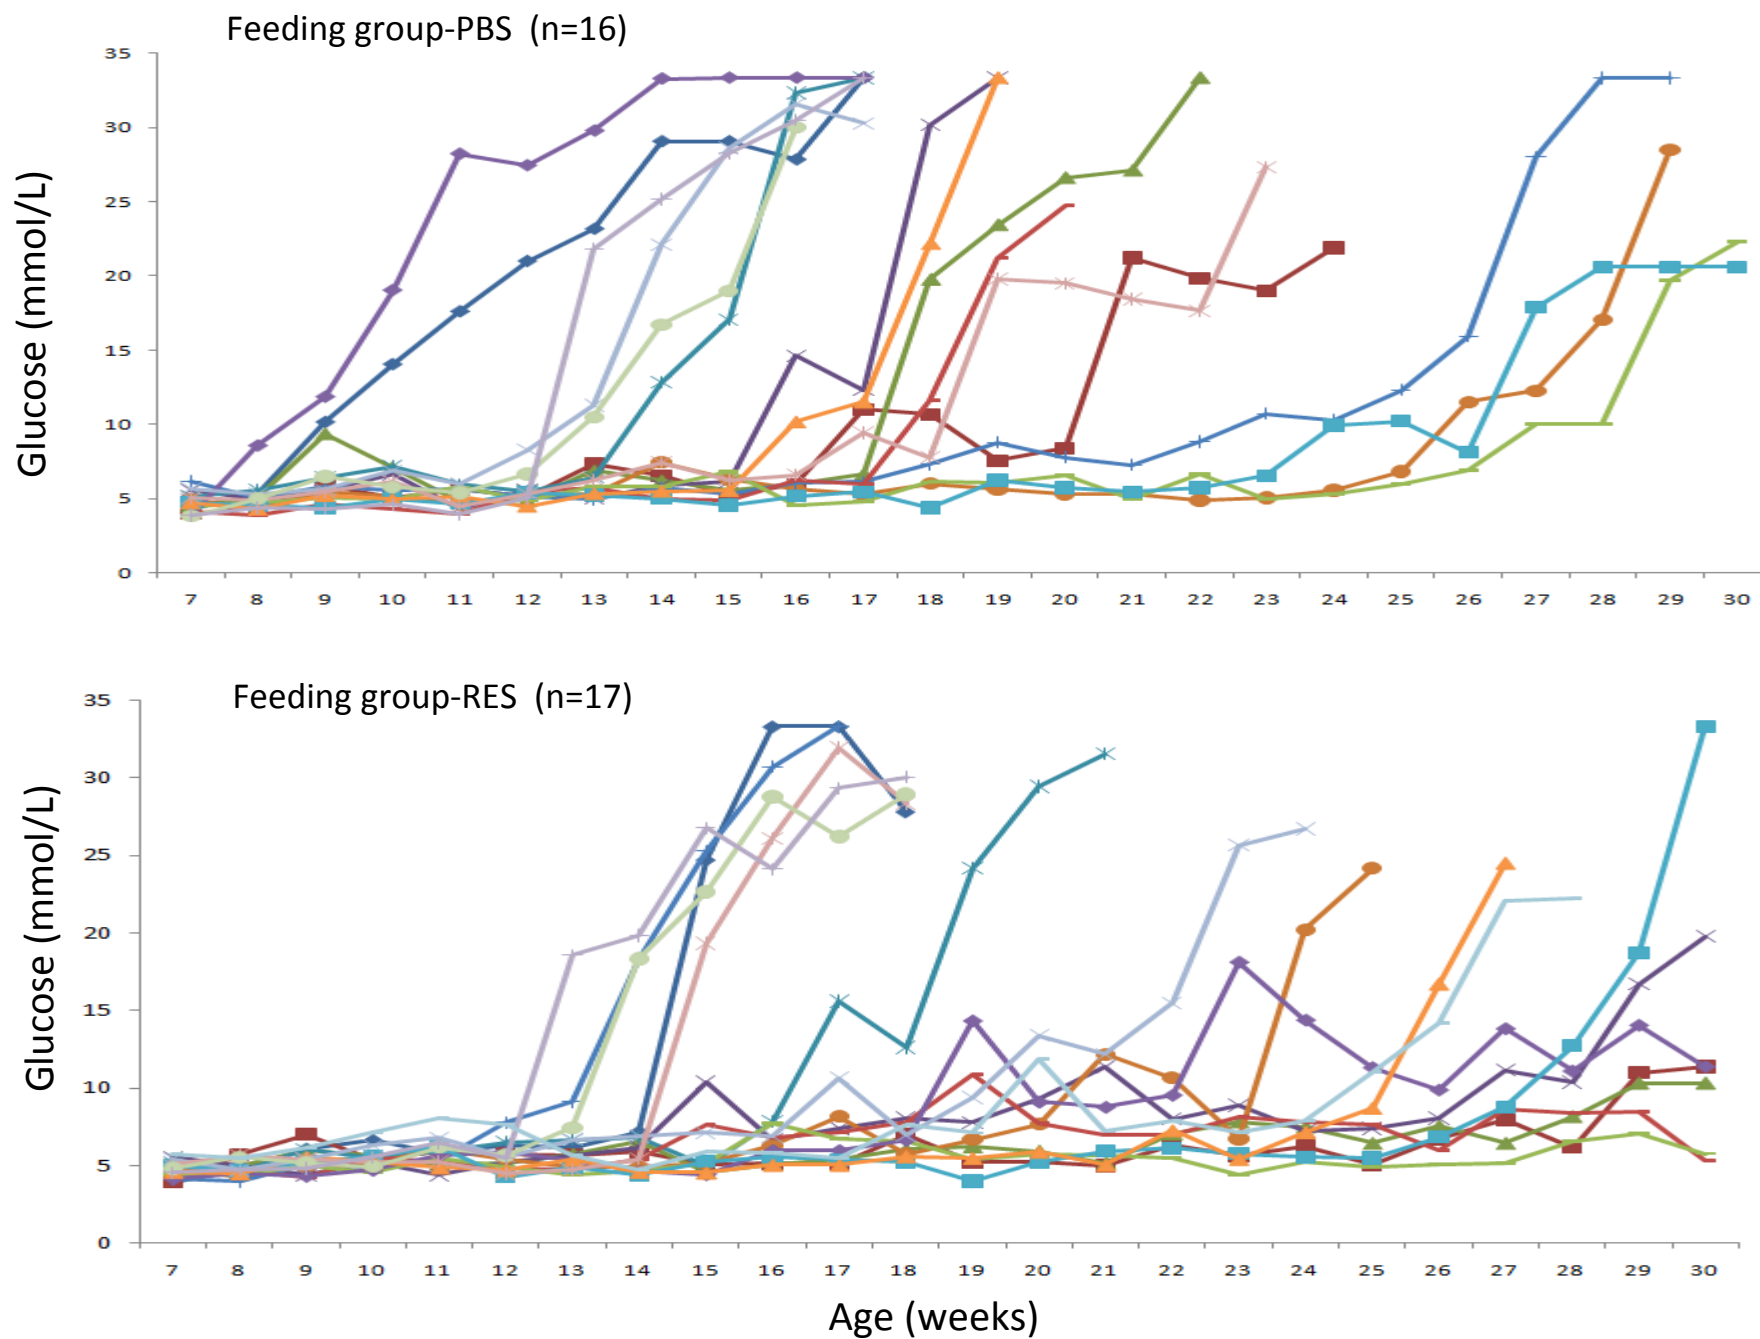

Supplemental Fig. 1c

c

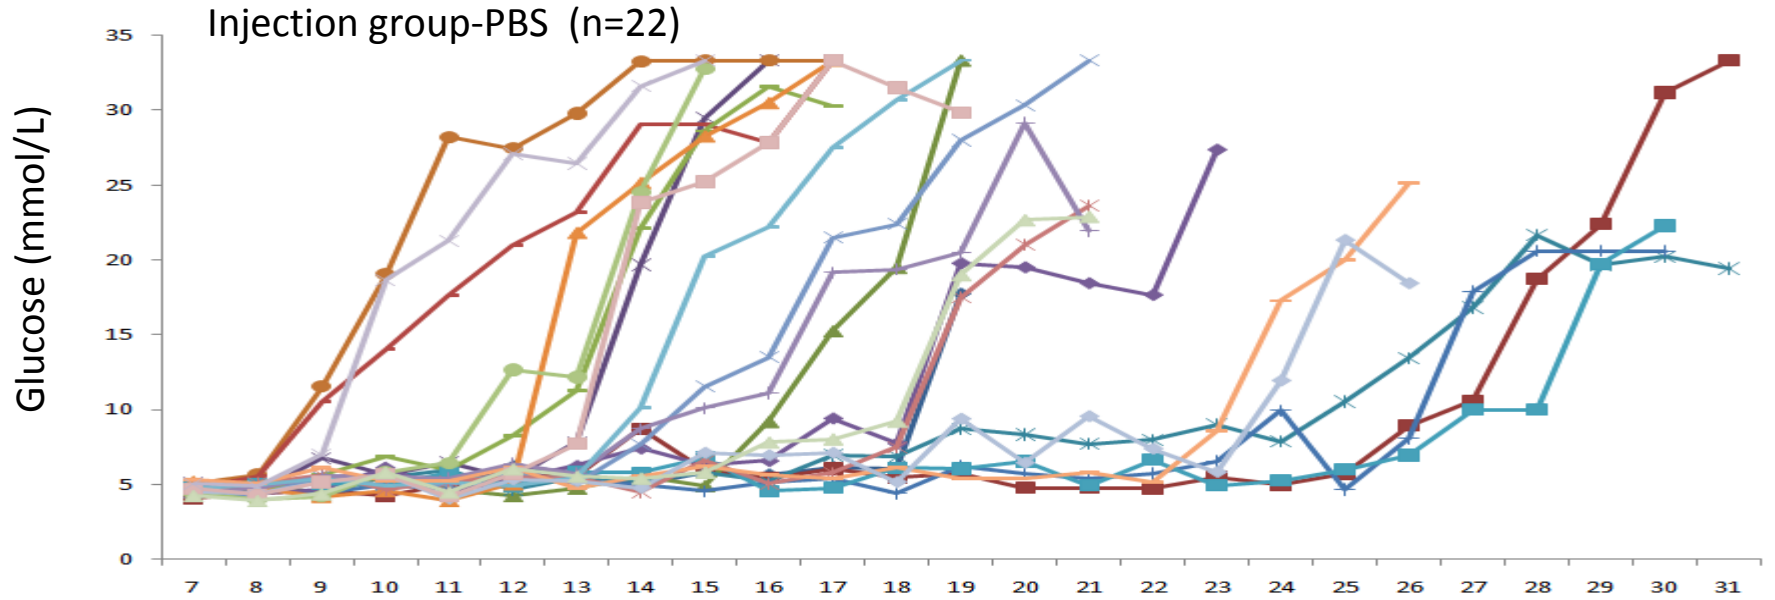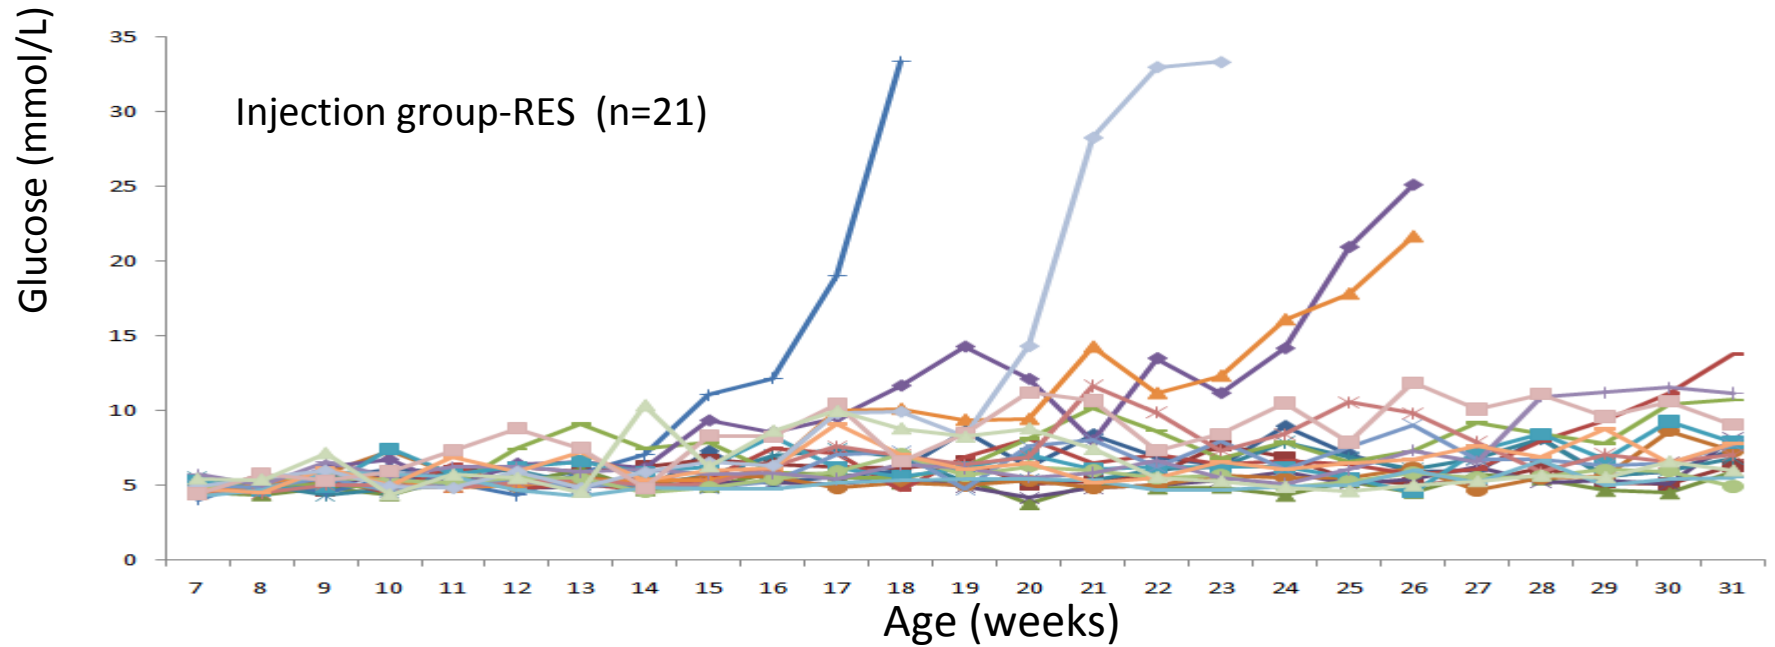

Supplement: NIHMS565966-supplement-2.pdf [file NIHMS565966-supplement-2.pdf]

Supplemental Fig. 2

a

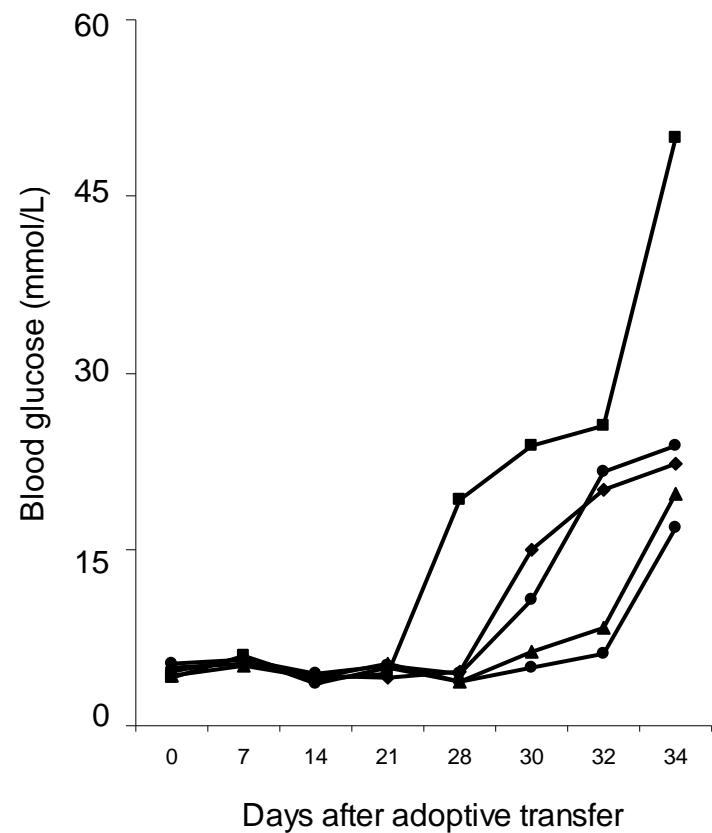

b

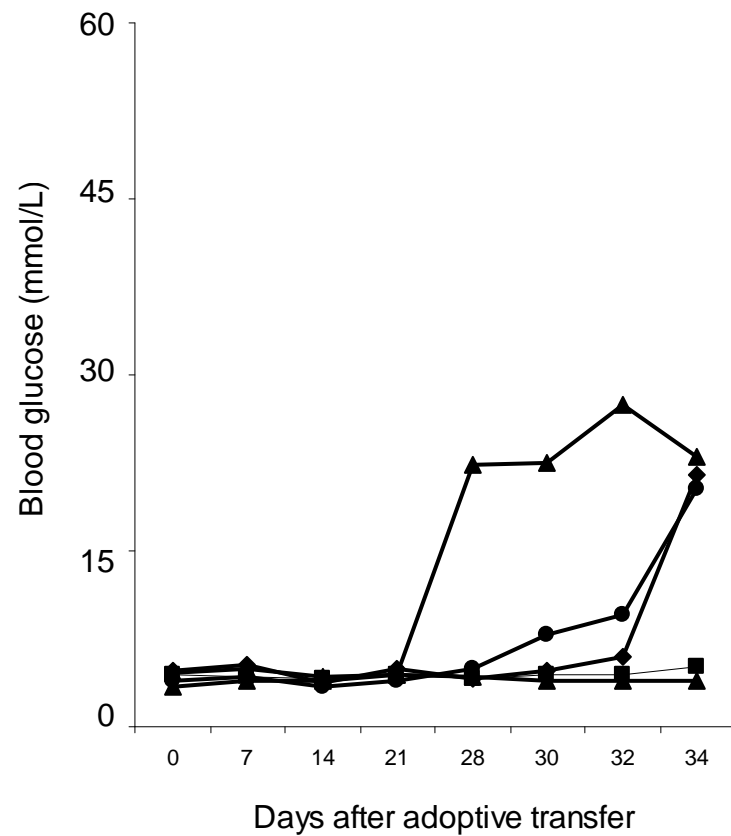

Supplement: NIHMS565966-supplement-3.pdf [file NIHMS565966-supplement-3.pdf]

Supplemental Fig. 3

a

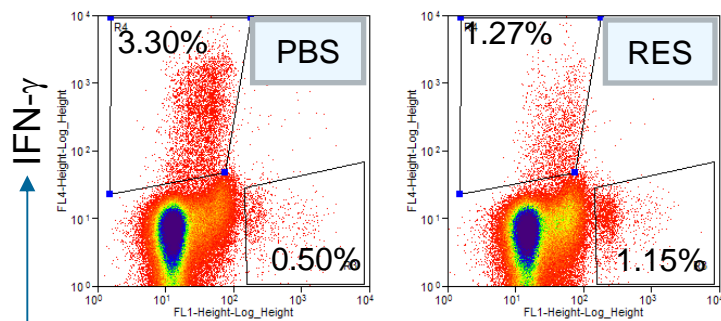

b

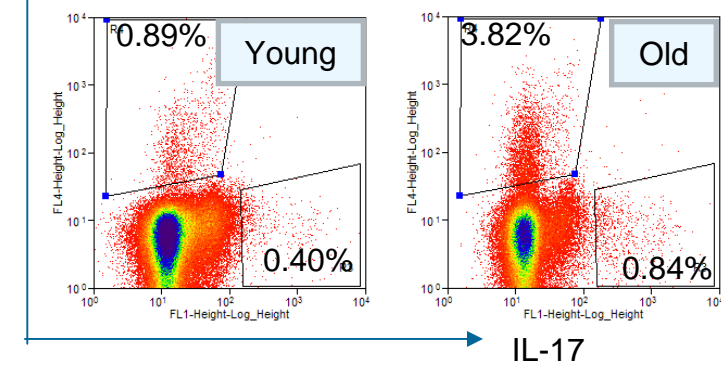

c

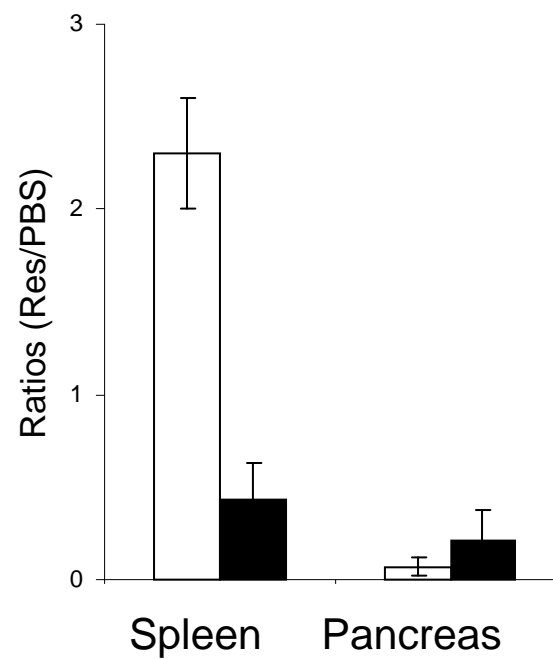

Supplement: NIHMS565966-supplement-4.pdf [file NIHMS565966-supplement-4.pdf]

Supplemental Fig. 4a & 4b

a

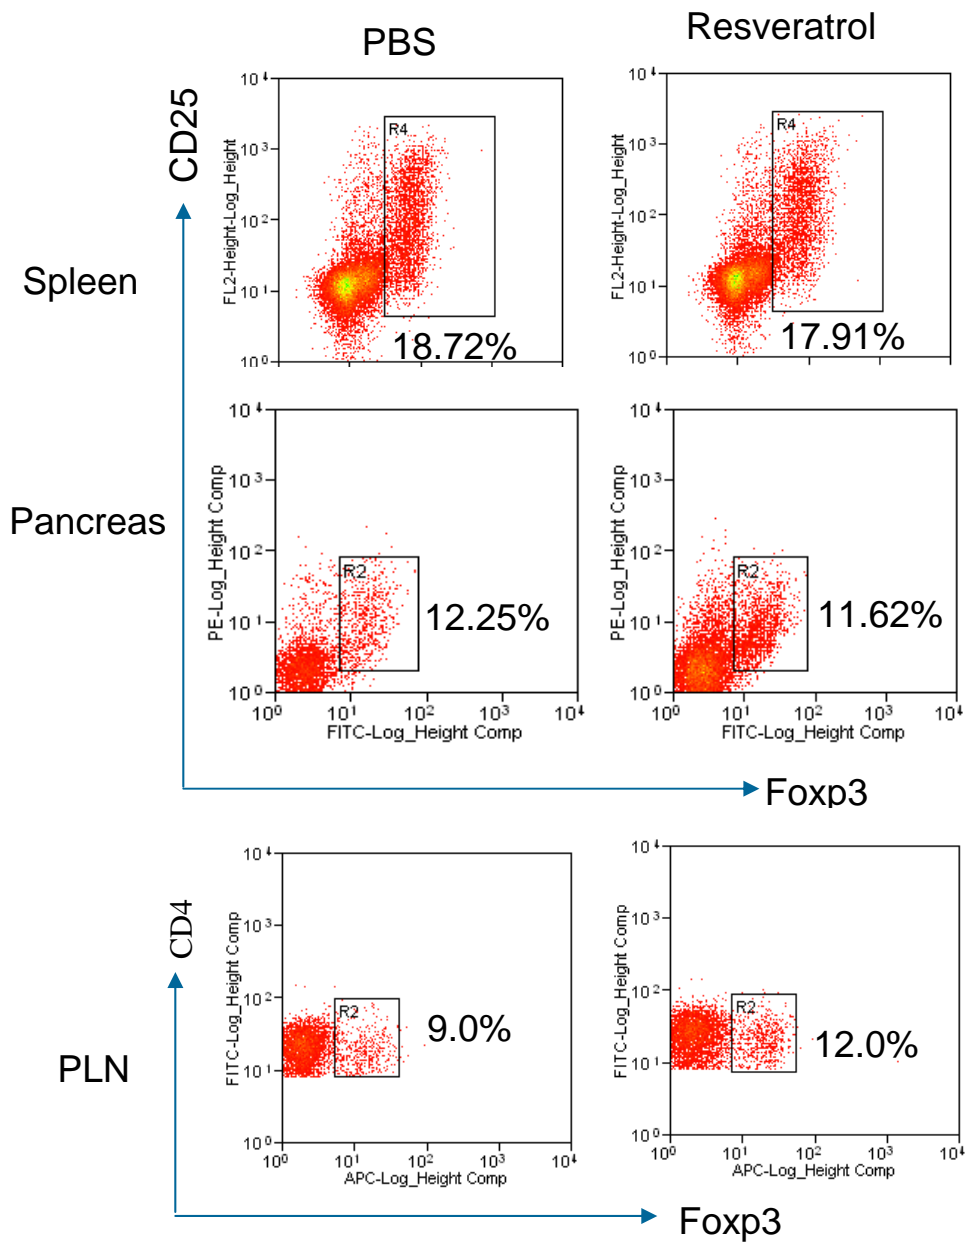

b

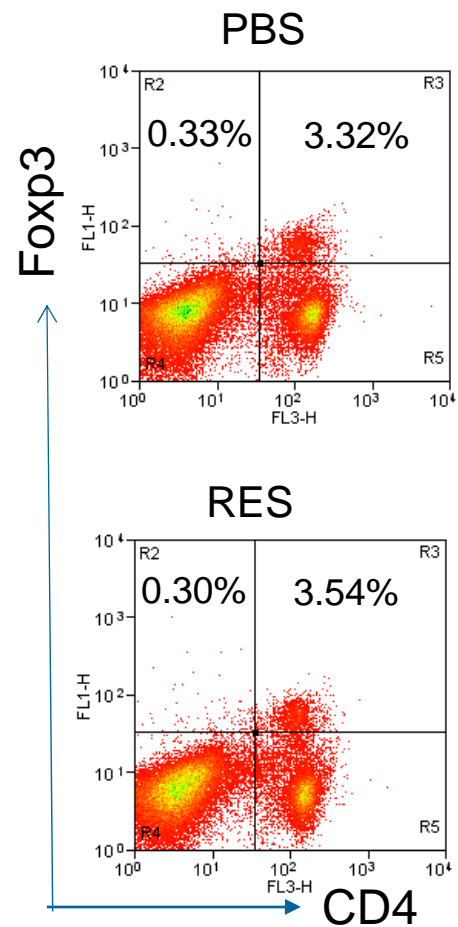

# Supplemental Fig. 4c

c

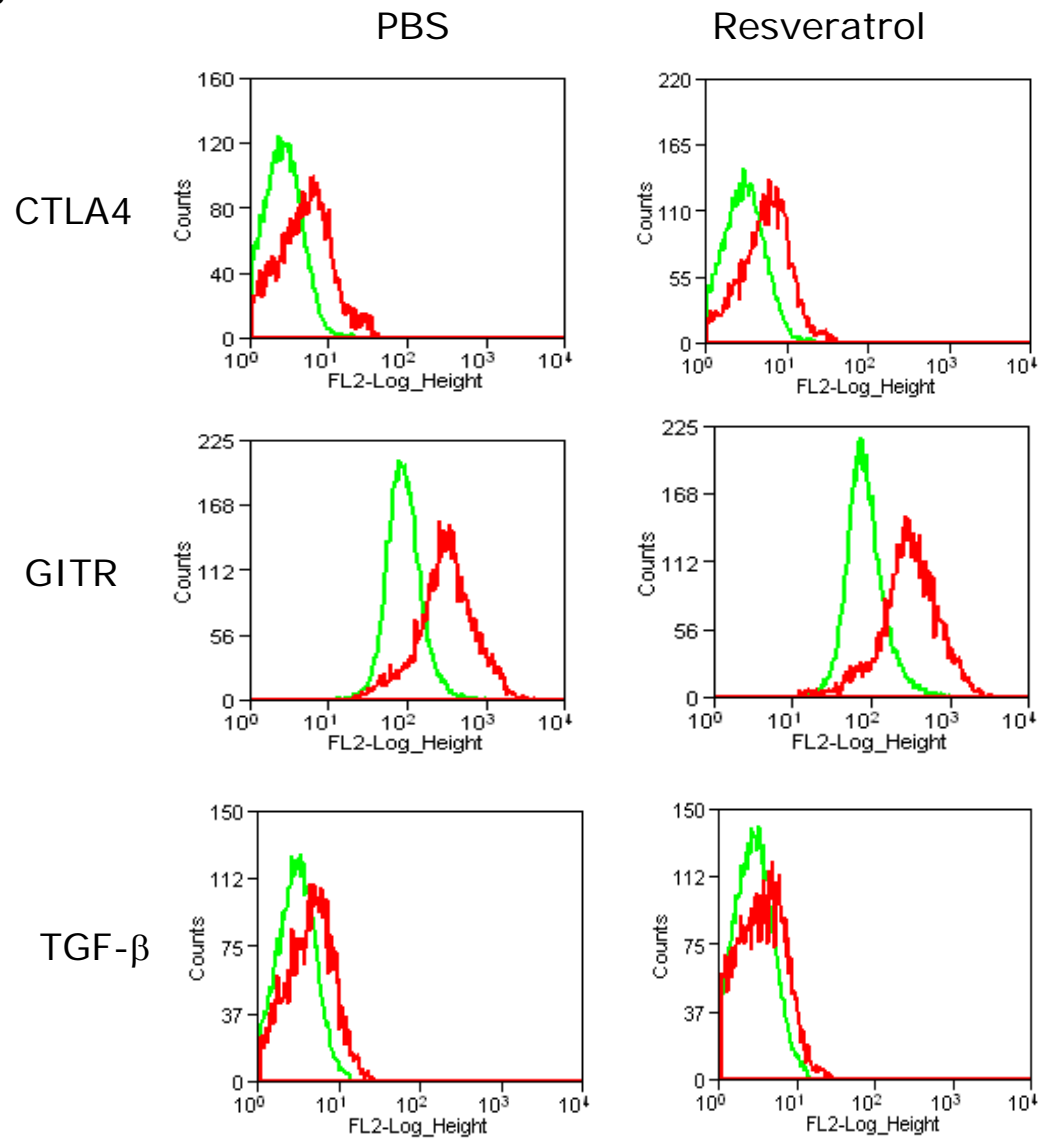

Supplement: NIHMS565966-supplement-5.pdf [file NIHMS565966-supplement-5.pdf]

# Supplemental Fig. 5

a

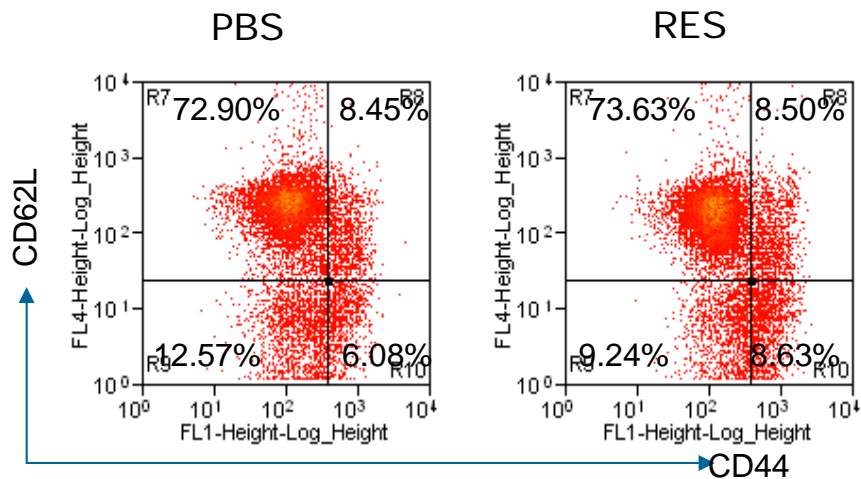

b

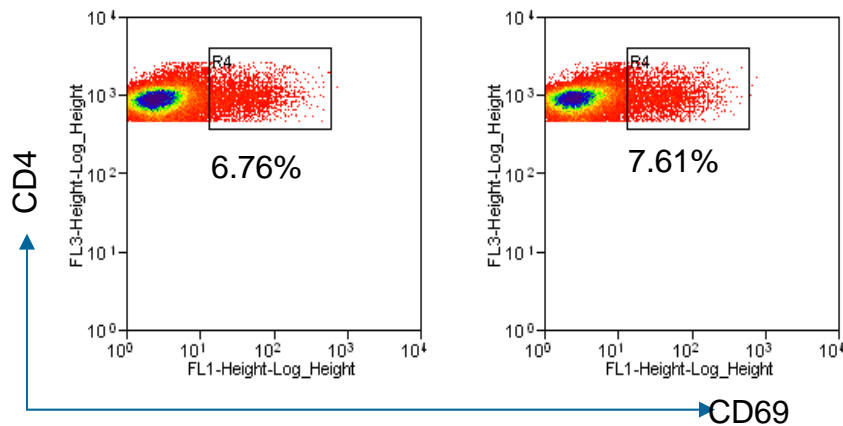

c

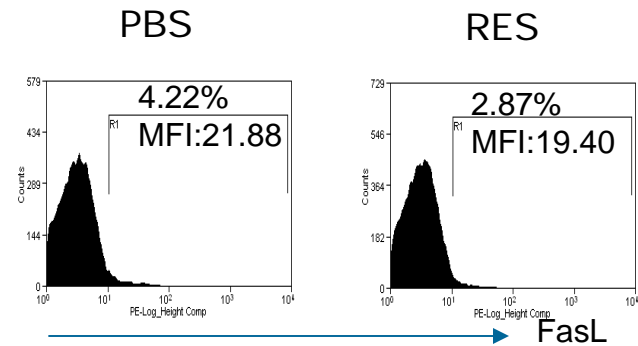

d

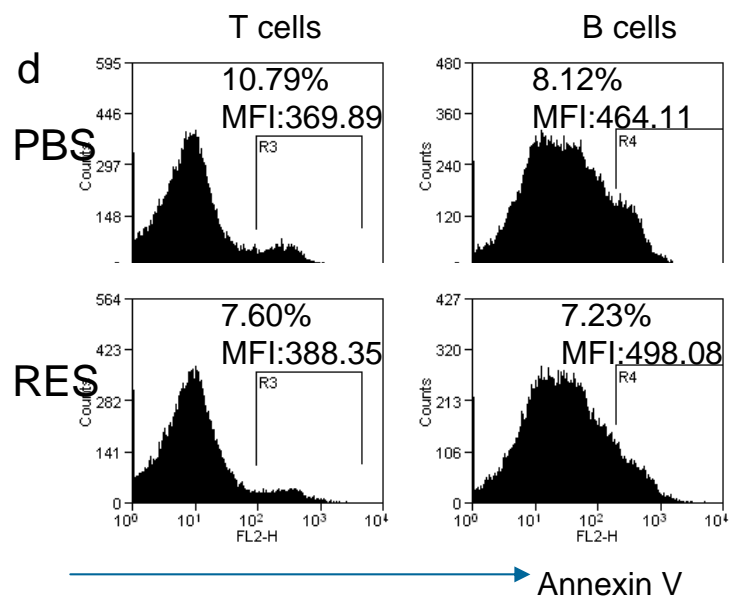

Supplement: NIHMS565966-supplement-6.pdf [file NIHMS565966-supplement-6.pdf]

Supplemental Fig. 6

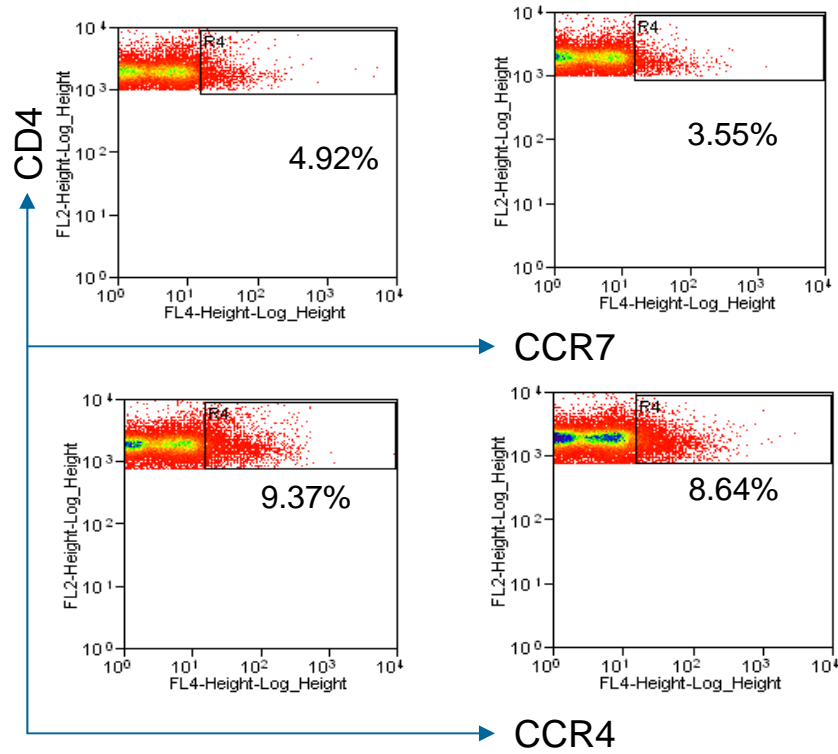

Supplement: NIHMS565966-supplement-7.pdf [file NIHMS565966-supplement-7.pdf]

# Supplemental Fig. 7a

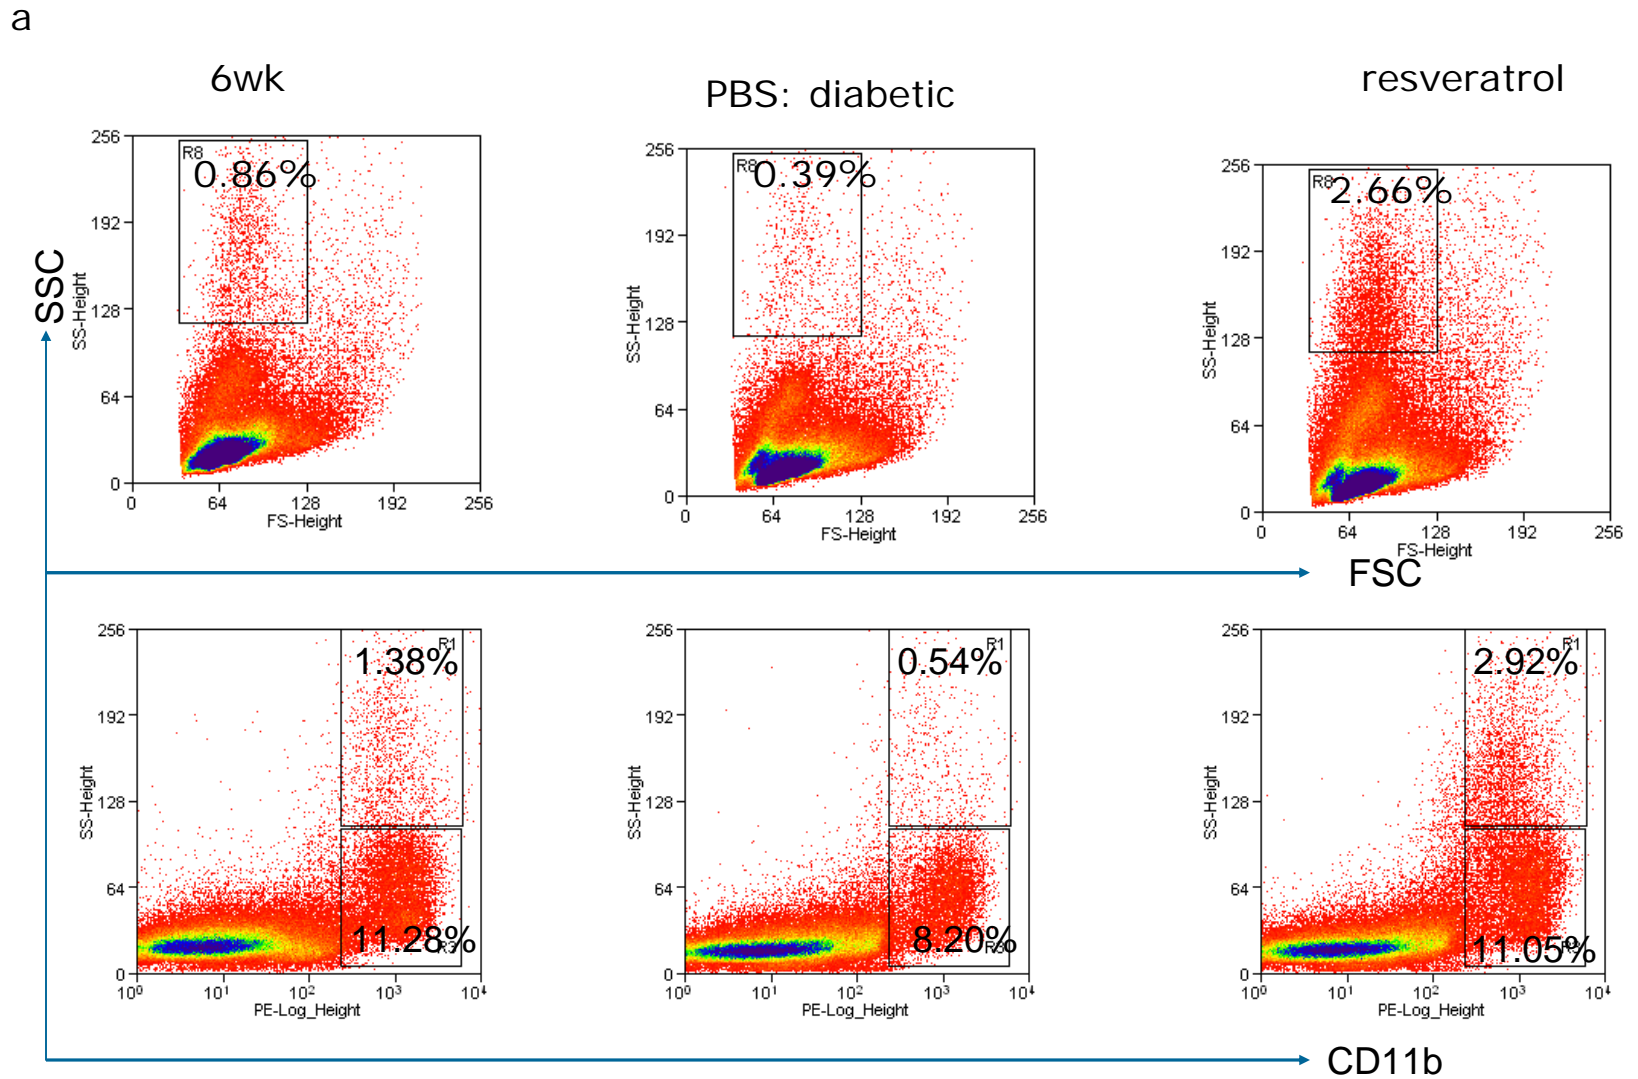

Supplemental Fig. 7b & c

b

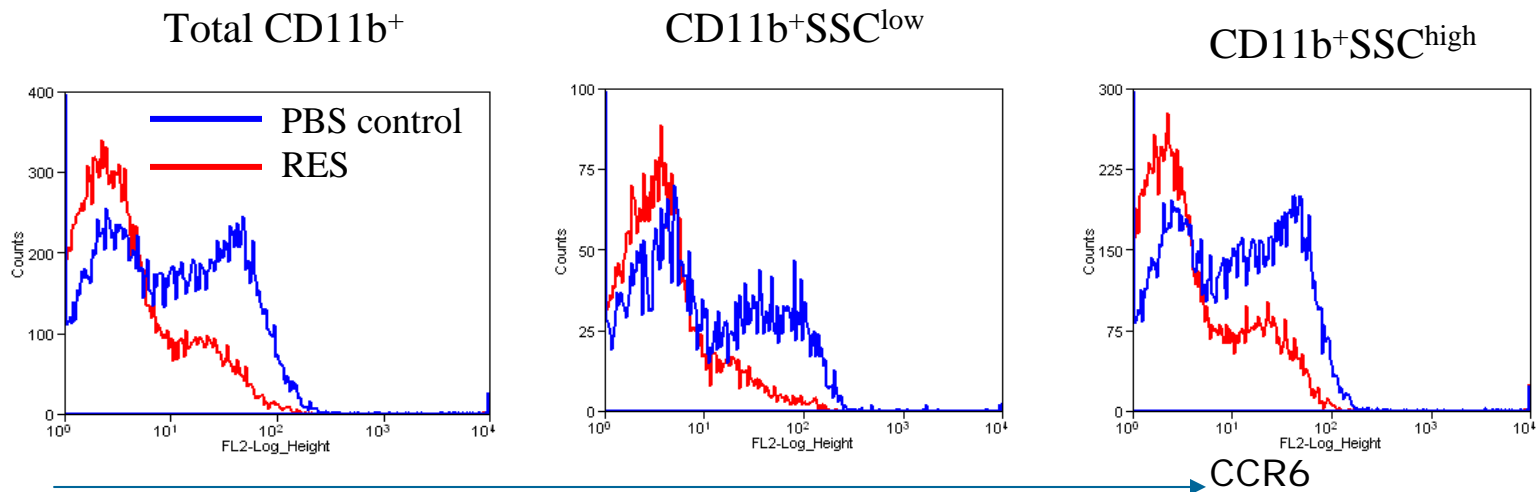

c

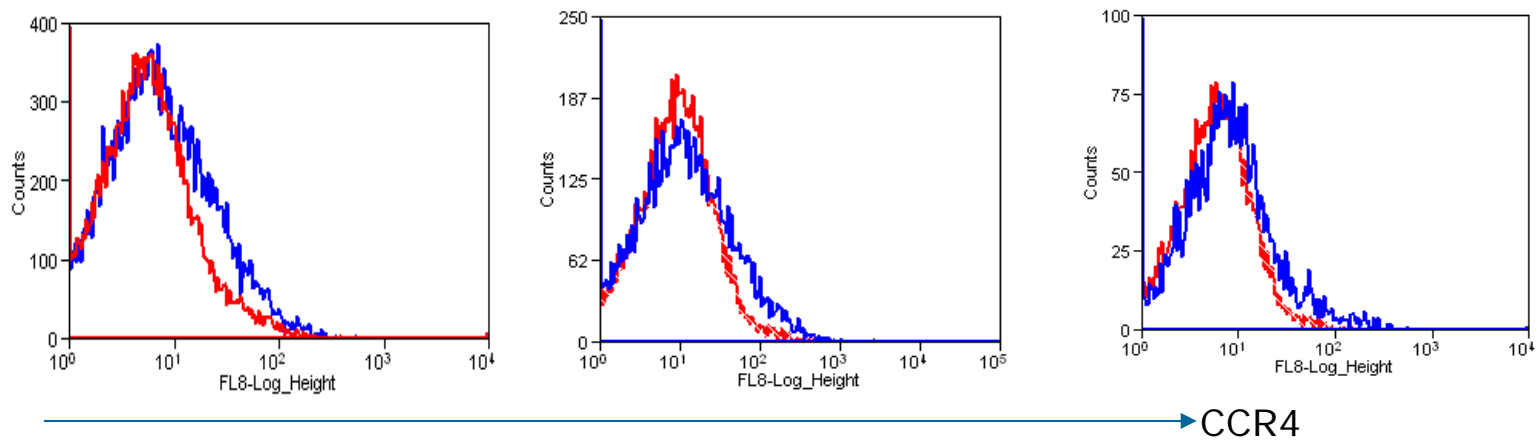

Supplement: NIHMS565966-supplement-8.pdf [file NIHMS565966-supplement-8.pdf]

Supplemental Fig. 8

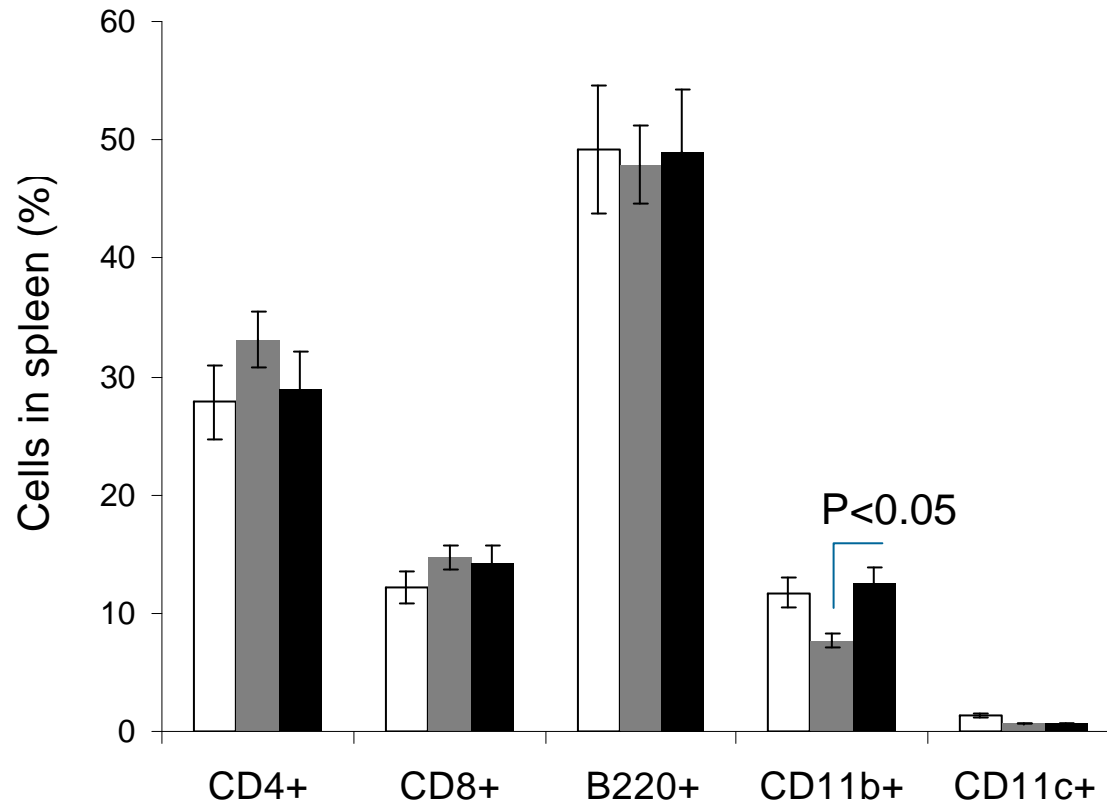

Supplement: NIHMS565966-supplement-9.pdf [file NIHMS565966-supplement-9.pdf]
